# Supplementary material
Source: PubMed Central journal article supplement (PMC2943208)
Supplement: NIHMS223279-supplement-Supplemental.pdf [file NIHMS223279-supplement-Supplemental.pdf]

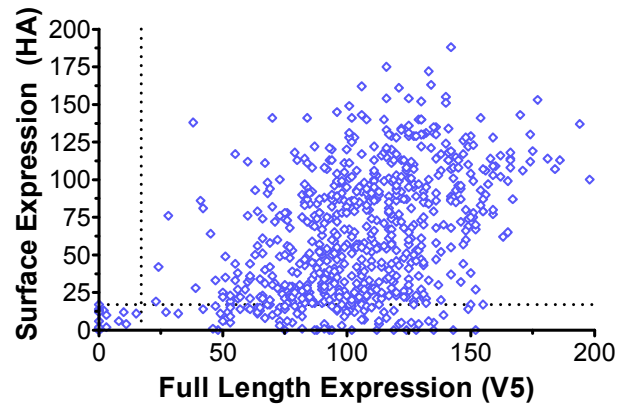

**Supplementary Figure 1. Expression of CCR5 mutation library.** CCR5 mutation arrays were methanol fixed and immunostained with a V5 MAb to determine full-length expression. In parallel, arrays were fixed with paraformaldehyde and immunostained with an HA MAb to determine surface expression. Expression levels of each clone are expressed as a percentage of the wild type CCR5 control. Using a cut-off of 17% (indicated by dashed lines), 96% of the CCR5 mutants were fully translated and 85% trafficked to the cell surface.
